# Supplementary material for: The Role of Immune Regulatory Cells in Nontraumatic Osteonecrosis of the Femoral Head: A Retrospective Clinical Study
Source: Hindawi journal article supplement (doi:10.1155/2019/1302015), 2019-11-20
Supplement: f1 [file 1302015.f1.pdf]

| 病案号       | 组别 | 性别 | 年龄 | 身高 | 体重  | 单双侧 | 病因 |   |
|-----------|----|----|----|----|-----|-----|----|---|
| 1,400,184 |    | 1  | 2  | 31 | 154 | 57  | 1  | 1 |
| 1,405,597 |    | 1  | 2  | 31 | 165 | 50  | 2  | 1 |
| 1,365,591 |    | 1  | 1  | 60 | 180 | 75  | 2  | 1 |
| 1,406,756 |    | 1  | 1  | 49 | 170 | 60  | 1  | 1 |
| 1,406,876 |    | 1  | 1  | 73 | 160 | 55  | 2  | 3 |
| 1,408,117 |    | 1  | 1  | 57 | 176 | 80  | 2  | 2 |
| 1,408,687 |    | 1  | 1  | 54 | 174 | 75  | 1  | 3 |
| 1,409,299 |    | 1  | 1  | 38 | 178 | 71  | 2  | 3 |
| 1,411,569 |    | 1  | 2  | 58 | 168 | 55  | 2  | 3 |
| 1,411,994 |    | 1  | 1  | 57 | 170 | 75  | 1  | 3 |
| 1,412,719 |    | 1  | 1  | 42 | 170 | 84  | 1  | 2 |
| 1,412,894 |    | 1  | 1  | 33 | 175 | 64  | 2  | 3 |
| 1,413,238 |    | 1  | 1  | 34 | 170 | 82  | 1  | 3 |
| 1,264,404 |    | 1  | 1  | 60 | 163 | 73  | 2  | 1 |
| 1,414,450 |    | 1  | 1  | 43 | 160 | 65  | 2  | 3 |
| 1,416,033 |    | 1  | 2  | 63 | 158 | 52  | 1  | 2 |
| 1,419,586 |    | 1  | 2  | 44 | 167 | 85  | 1  | 1 |
| 1,429,922 |    | 1  | 1  | 42 | 170 | 75  | 2  | 1 |
| 1,425,234 |    | 1  | 1  | 22 | 180 | 60  | 2  | 3 |
| 1,437,858 |    | 1  | 1  | 27 | 173 | 77  | 1  | 3 |
| 1,437,760 |    | 1  | 1  | 50 | 165 | 56  | 1  | 2 |
| 1,440,509 |    | 1  | 1  | 56 | 163 | 60  | 1  | 2 |
| 1,440,466 |    | 1  | 1  | 26 | 181 | 74  | 1  | 3 |
| 1,440,484 |    | 1  | 1  | 29 | 180 | 68  | 1  | 3 |
| 1,440,703 |    | 1  | 1  | 46 | 166 | 66  | 1  | 2 |
| 1,441,812 |    | 1  | 1  | 34 | 181 | 76  | 1  | 2 |
| 1,442,722 |    | 1  | 1  | 53 | 170 | 75  | 2  | 2 |
| 1,353,751 |    | 1  | 2  | 20 | 167 | 54  | 2  | 1 |
| 1,448,265 |    | 1  | 1  | 51 | 168 | 75  | 1  | 2 |
| 1,448,602 |    | 1  | 1  | 26 | 170 | 80  | 2  | 1 |
| 1,449,749 |    | 1  | 1  | 51 | 180 | 82  | 1  | 2 |
| 1,450,493 |    | 1  | 1  | 22 | 180 | 72  | 2  | 1 |
| 1,450,305 |    | 1  | 1  | 46 | 169 | 74  | 2  | 2 |
| 1,450,963 |    | 1  | 2  | 37 | 158 | 73  | 1  | 3 |
| 1,451,209 |    | 1  | 2  | 46 | 158 | 70  | 1  | 3 |
| 1,451,371 |    | 1  | 1  | 34 | 171 | 85  | 2  | 3 |
| 1,451,557 |    | 1  | 1  | 45 | 170 | 75  | 2  | 2 |
| 1,452,319 |    | 1  | 1  | 51 | 178 | 95  | 1  | 2 |
| 1,452,591 |    | 1  | 1  | 30 | 175 | 85  | 2  | 2 |
| 1,283,183 |    | 1  | 2  | 61 | 158 | 58  | 2  | 3 |
| 1,453,984 |    | 1  | 1  | 32 | 185 | 84  | 1  | 3 |
| 1,453,674 |    | 1  | 1  | 32 | 185 | 71  | 2  | 1 |
| 1,454,115 |    | 1  | 1  | 62 | 167 | 71  | 1  | 3 |
| 1,455,032 |    | 1  | 1  | 39 | 176 | 80  | 1  | 3 |
| 1,456,077 |    | 1  | 2  | 51 | 163 | 69  | 1  | 3 |
| 1,456,214 |    | 1  | 1  | 45 | 170 | 66  | 1  | 2 |
| 1,456,804 |    | 1  | 1  | 32 | 177 | 80  | 2  | 2 |
| 1,429,275 |    | 1  | 1  | 26 | 183 | 69  | 2  | 3 |
| 1,456,887 |    | 1  | 1  | 43 | 172 | 96  | 2  | 3 |
| 1,456,912 |    | 1  | 1  | 33 | 170 | 86  | 1  | 3 |
| 1,457,556 |    | 1  | 1  | 54 | 178 | 70  | 2  | 3 |
| 1,458,267 |    | 1  | 1  | 47 | 179 | 68  | 1  | 1 |
| 1,460,963 |    | 1  | 1  | 26 | 172 | 72  | 2  | 1 |
| 1,460,723 |    | 1  | 1  | 53 | 170 | 68  | 2  | 3 |
| 1,459,737 |    | 1  | 1  | 31 | 174 | 86  | 1  | 3 |

| 淋巴细胞总数 | 淋巴细胞百分数 | 淋巴细胞计数 | T淋巴细胞 | CD3T辅助诱导 | CD3CD4T抑制杀伤 | CD3CD8 |
|--------|---------|--------|-------|----------|-------------|--------|
| 2.130  | 27.1    | 1,840  | 1,426 | 773      | 626         |        |
| 1.060  | 18.9    | 1,060  | 815   | 515      | 289         |        |
| 0.800  | 14.2    | 800    | 505   | 282      | 214         |        |
| 3.310  | 44.6    | 3,310  | 2,012 | 861      | 1,102       |        |
| 1.450  | 16.4    | 1,450  | 712   | 509      | 175         |        |
| 0.670  | 7.9     | 670    | 312   | 204      | 104         |        |
| 1.270  | 12.5    | 1,270  | 758   | 415      | 304         |        |
| 4.170  | 33.4    | 4,170  | 3,178 | 1,314    | 1,389       |        |
| 2.210  | 40.1    | 2,210  | 1,313 | 800      | 442         |        |
| 2.730  | 28.6    | 2,730  | 1,646 | 816      | 713         |        |
| 2.750  | 33.3    | 2,750  | 1,372 | 941      | 404         |        |
| 1.550  | 30.3    | 1,550  | 1,203 | 527      | 575         |        |
| 1.180  | 21.3    | 1,030  | 795   | 478      | 289         |        |
| 1.980  | 22.2    | 1,980  | 1,529 | 1,154    | 299         |        |
| 2.660  | 16.3    | 2,660  | 1,519 | 902      | 553         |        |
| 1.070  | 24.2    | 1,070  | 782   | 489      | 305         |        |
| 1.780  | 23.6    | 1,780  | 1,451 | 892      | 504         |        |
| 1.710  | 28.6    | 1,710  | 1,264 | 947      | 284         |        |
| 2.950  | 38.6    | 2,950  | 1,587 | 723      | 811         |        |
| 2.940  | 43.6    | 2,940  | 2,475 | 1,182    | 1,114       |        |
| 2.250  | 28.9    | 2,550  | 2,055 | 1,288    | 755         |        |
| 1.300  | 26.3    | 1,210  | 963   | 571      | 364         |        |
| 2.320  | 45.9    | 2,320  | 1,865 | 1,199    | 626         |        |
| 2.770  | 40.1    | 2,120  | 1,259 | 681      | 547         |        |
| 2.030  | 31.2    | 2,030  | 1,328 | 834      | 414         |        |
| 1.930  | 28.0    | 1,930  | 1,372 | 758      | 550         |        |
| 1.910  | 26.5    | 1,910  | 1,308 | 970      | 296         |        |
| 2.030  | 29.9    | 2,030  | 1,358 | 696      | 617         |        |
| 1.990  | 35.1    | 1,990  | 1,473 | 846      | 593         |        |
| 1.500  | 33.0    | 1,500  | 1,238 | 477      | 701         |        |
| 1.530  | 23.9    | 1,530  | 1,258 | 644      | 546         |        |
| 1.990  | 36.5    | 1,990  | 1,457 | 890      | 507         |        |
| 2.000  | 32.0    | 2,000  | 1,172 | 710      | 366         |        |
| 2.220  | 36.8    | 2,220  | 1,685 | 722      | 921         |        |
| 1.920  | 38.9    | 1,920  | 1,321 | 739      | 401         |        |
| 1.550  | 20.8    | 1,770  | 1,333 | 784      | 490         |        |
| 2.940  | 40.9    | 2,940  | 2,246 | 1,367    | 676         |        |
| 2.030  | 28.7    | 2,030  | 1,520 | 997      | 499         |        |
| 2.960  | 36.1    | 2,960  | 2,072 | 1,107    | 924         |        |
| 2.520  | 42.1    | 2,520  | 1,462 | 1,036    | 396         |        |
| 4.280  | 46.5    | 4,280  | 3,548 | 2,204    | 1,395       |        |
| 1.590  | 27.4    | 1,590  | 949   | 418      | 452         |        |
| 2.560  | 30.5    | 2,590  | 1,987 | 1,038    | 831         |        |
| 2.030  | 21.6    | 2,030  | 1,701 | 1,009    | 615         |        |
| 1.800  | 34.6    | 1,800  | 1,413 | 819      | 553         |        |
| 1.550  | 24.8    | 1,550  | 1,231 | 859      | 341         |        |
| 1.930  | 35.0    | 1,930  | 1,357 | 687      | 591         |        |
| 2.370  | 35.2    | 2,530  | 1,822 | 898      | 873         |        |
| 1.710  | 27.6    | 1,710  | 1,206 | 814      | 373         |        |
| 2.200  | 18.9    | 2,200  | 1,698 | 823      | 814         |        |
| 2.430  | 39.5    | 2,430  | 1,910 | 1,560    | 326         |        |
| 2.080  | 38.4    | 2,080  | 1,649 | 1,148    | 422         |        |
| 3.360  | 36.2    | 3,360  | 2,644 | 1,788    | 759         |        |
| 2.110  | 26.9    | 2,110  | 1,317 | 844      | 414         |        |
| 2.750  | 32.2    | 2,750  | 1,991 | 1,139    | 789         |        |

| T总百分比 | T辅助百分比 | T抑制百分比 | Th比Ts | B1绝对值 | B2绝对值 | B细胞亚群B1CD5CD1 |
|-------|--------|--------|-------|-------|-------|---------------|
| 77.5  | 42.0   | 34.0   | 1.24  | 82    | 223   | 4.45          |
| 76.9  | 48.6   | 27.3   | 1.78  | 13    | 42    | 1.20          |
| 63.1  | 35.3   | 26.7   | 1.32  | 25    | 72    | 3.07          |
| 60.8  | 26.0   | 33.3   | 0.78  | 66    | 203   | 2.00          |
| 49.1  | 35.1   | 12.1   | 2.90  | 238   | 216   | 16.40         |
| 46.6  | 30.4   | 15.5   | 1.96  | 56    | 109   | 8.33          |
| 59.7  | 32.7   | 23.9   | 1.37  | 71    | 124   | 5.60          |
| 76.2  | 31.5   | 33.3   | 0.95  | 195   | 331   | 4.67          |
| 59.4  | 36.2   | 20.0   | 1.81  | 32    | 108   | 1.47          |
| 60.3  | 29.9   | 26.1   | 1.15  | 188   | 379   | 6.88          |
| 49.9  | 34.2   | 14.7   | 2.33  | 310   | 371   | 11.28         |
| 77.6  | 34.0   | 37.1   | 0.92  | 91    | 187   | 5.87          |
| 77.2  | 46.4   | 28.1   | 1.65  | 76    | 50    | 7.40          |
| 77.2  | 58.3   | 15.1   | 3.86  | 108   | 219   | 5.47          |
| 57.1  | 33.9   | 20.8   | 1.63  | 13    | 130   | 0.47          |
| 73.1  | 45.7   | 28.5   | 1.60  | 16    | 69    | 1.47          |
| 81.5  | 50.1   | 28.3   | 1.77  | 13    | 20    | 0.73          |
| 73.9  | 55.4   | 16.6   | 3.34  | 94    | 239   | 5.50          |
| 53.8  | 24.5   | 27.5   | 0.89  | 547   | 547   | 18.55         |
| 84.2  | 40.2   | 37.9   | 1.06  | 59    | 276   | 2.00          |
| 80.6  | 50.5   | 29.6   | 1.71  | 56    | 2,477 | 2.20          |
| 79.6  | 47.2   | 30.1   | 1.57  | 58    | 65    | 4.80          |
| 80.4  | 51.7   | 27.0   | 1.91  | 122   | 146   | 5.25          |
| 59.4  | 32.1   | 25.8   | 1.24  | 93    | 139   | 4.40          |
| 65.4  | 41.4   | 20.4   | 2.01  | 86    | 202   | 4.25          |
| 71.1  | 39.3   | 28.5   | 1.38  | 61    | 199   | 3.15          |
| 68.5  | 50.8   | 15.5   | 3.28  | 146   | 269   | 7.65          |
| 66.9  | 34.3   | 30.4   | 1.13  | 177   | 166   | 8.70          |
| 74.0  | 42.5   | 29.8   | 1.43  | 122   | 126   | 6.15          |
| 82.5  | 31.8   | 46.7   | 0.68  | 100   | 107   | 6.65          |
| 82.2  | 42.1   | 35.7   | 1.18  | 60    | 89    | 3.95          |
| 73.2  | 44.7   | 25.5   | 1.75  | 82    | 146   | 4.10          |
| 58.6  | 35.5   | 18.3   | 1.94  | 234   | 239   | 11.70         |
| 75.9  | 32.5   | 41.5   | 0.78  | 120   | 112   | 5.40          |
| 68.8  | 38.5   | 20.9   | 1.84  | 186   | 164   | 9.70          |
| 75.3  | 44.3   | 27.7   | 1.60  | 23    | 171   | 1.30          |
| 76.4  | 46.5   | 23.0   | 2.02  | 176   | 243   | 6.00          |
| 74.9  | 49.1   | 24.6   | 2.00  | 54    | 254   | 2.65          |
| 70.0  | 37.4   | 31.2   | 1.20  | 284   | 274   | 9.58          |
| 58.0  | 41.1   | 15.7   | 2.62  | 97    | 377   | 3.84          |
| 82.9  | 51.5   | 32.6   | 1.58  | 103   | 347   | 2.40          |
| 59.7  | 26.3   | 28.4   | 0.93  | 291   | 311   | 18.33         |
| 76.7  | 41.8   | 32.1   | 1.30  | 73    | 227   | 2.81          |
| 83.8  | 49.7   | 30.3   | 1.64  | 18    | 157   | 0.90          |
| 78.5  | 45.5   | 30.7   | 1.48  | 47    | 146   | 2.60          |
| 79.4  | 55.4   | 22.0   | 2.52  | 40    | 131   | 2.58          |
| 70.3  | 35.6   | 30.6   | 1.16  | 212   | 235   | 11.00         |
| 72.0  | 35.5   | 34.5   | 1.03  | 128   | 233   | 5.05          |
| 70.5  | 47.6   | 21.8   | 2.18  | 13    | 61    | 0.75          |
| 77.2  | 37.4   | 37.0   | 1.01  | 107   | 224   | 4.85          |
| 78.6  | 64.2   | 13.4   | 4.79  | 119   | 377   | 4.90          |
| 79.3  | 55.2   | 20.3   | 2.72  | 19    | 150   | 0.89          |
| 78.7  | 53.2   | 22.6   | 2.35  | 180   | 323   | 5.35          |
| 62.4  | 40.0   | 19.6   | 2.04  | 42    | 302   | 2.00          |
| 72.4  | 41.4   | 28.7   | 1.44  | 206   | 385   | 7.50          |

B细胞亚群B2CD5CD19

12.10  
3.83  
9.00  
6.13  
14.87  
16.20  
9.73  
7.93  
4.87  
13.88  
13.49  
12.07  
4.84  
11.07  
4.87  
6.47  
1.13  
14.00  
18.55  
9.40  
9.70  
5.35  
6.30  
6.55  
9.95  
10.30  
14.10  
8.20  
6.35  
7.15  
5.80  
7.35  
11.95  
5.05  
8.55  
9.67  
8.25  
12.50  
9.24  
14.95  
8.10  
19.53  
8.75  
7.75  
8.10  
8.43  
12.18  
9.20  
3.55  
10.20  
15.50  
7.19  
960.00  
14.30  
14.00

|           |   |   |    |     |    |        |        |
|-----------|---|---|----|-----|----|--------|--------|
| 1,460,311 | 1 | 2 | 55 | 165 | 62 | 1      | 3      |
| 1,461,397 | 1 | 1 | 61 | 170 | 65 | 2      | 2      |
| 1,465,651 | 1 | 1 | 48 | 184 | 70 | 2      | 2      |
| 1,466,283 | 1 | 2 | 61 | 158 | 59 | 1      | 2      |
| 1,468,602 | 1 | 1 | 38 | 175 | 73 | 2      | 2      |
| 1,468,323 | 1 | 1 | 49 | 170 | 65 | 1      | 2      |
| 1,469,414 | 1 | 1 | 50 | 174 | 70 | 1      | 2      |
| 1,470,693 | 1 | 1 | 30 | 165 | 60 | 2      | 1      |
| 1,472,361 | 1 | 1 | 56 | 170 | 69 | 2      | 1      |
| 1,473,586 | 1 | 2 | 60 | 163 | 60 | 2      | 3      |
| 1,487,573 | 1 | 1 | 19 | 172 | 50 | 2      | 1      |
| 1,489,611 | 1 | 1 | 55 | 160 | 46 | 2      | 3      |
| 54,145    | 2 | 1 | 47 | 162 | 54 | #NULL! | #NULL! |
| 1,233,478 | 2 | 1 | 52 | 165 | 60 | #NULL! | #NULL! |
| 98,235    | 2 | 2 | 52 | 166 | 63 | #NULL! | #NULL! |
| 1,105,194 | 2 | 1 | 52 | 170 | 81 | #NULL! | #NULL! |
| 1,290,918 | 2 | 2 | 54 | 165 | 65 | #NULL! | #NULL! |
| 1,330,113 | 2 | 1 | 51 | 180 | 95 | #NULL! | #NULL! |
| 1,405,675 | 2 | 1 | 42 | 170 | 67 | #NULL! | #NULL! |
| 1,405,905 | 2 | 1 | 56 | 170 | 81 | #NULL! | #NULL! |
| 1,426,793 | 2 | 1 | 52 | 173 | 84 | #NULL! | #NULL! |
| 1,439,770 | 2 | 1 | 31 | 178 | 80 | #NULL! | #NULL! |
| 1,456,764 | 2 | 1 | 48 | 178 | 90 | #NULL! | #NULL! |
| 1,480,440 | 2 | 1 | 55 | 166 | 63 | #NULL! | #NULL! |
| 2,202,044 | 2 | 1 | 56 | 178 | 90 | #NULL! | #NULL! |
| 2,252,301 | 2 | 1 | 57 | 167 | 60 | #NULL! | #NULL! |
| 1,439,770 | 2 | 2 | 31 | 178 | 80 | #NULL! | #NULL! |
| 1,456,764 | 2 | 1 | 48 | 178 | 90 | #NULL! | #NULL! |
| 2,257,930 | 2 | 1 | 50 | 165 | 69 | #NULL! | #NULL! |
| 2,259,363 | 2 | 2 | 51 | 173 | 65 | #NULL! | #NULL! |
| 2,259,432 | 2 | 1 | 40 | 166 | 55 | #NULL! | #NULL! |
| 2,259,453 | 2 | 1 | 57 | 165 | 71 | #NULL! | #NULL! |
| 2,259,465 | 2 | 1 | 50 | 166 | 68 | #NULL! | #NULL! |
| 2,259,551 | 2 | 1 | 58 | 166 | 75 | #NULL! | #NULL! |
| 2,259,865 | 2 | 1 | 55 | 169 | 45 | #NULL! | #NULL! |
| 2,259,891 | 2 | 2 | 56 | 164 | 65 | #NULL! | #NULL! |
| 2,259,997 | 2 | 2 | 49 | 164 | 69 | #NULL! | #NULL! |
| 2,260,000 | 2 | 1 | 39 | 178 | 91 | #NULL! | #NULL! |
| 2,260,582 | 2 | 1 | 66 | 168 | 55 | #NULL! | #NULL! |
| 2,260,976 | 2 | 1 | 50 | 170 | 58 | #NULL! | #NULL! |
| 2,261,006 | 2 | 1 | 51 | 160 | 45 | #NULL! | #NULL! |
| 2,261,054 | 2 | 2 | 28 | 169 | 54 | #NULL! | #NULL! |
| 2,261,059 | 2 | 1 | 40 | 178 | 84 | #NULL! | #NULL! |
| 2,261,070 | 2 | 1 | 58 | 164 | 70 | #NULL! | #NULL! |
| 2,261,078 | 2 | 1 | 49 | 165 | 70 | #NULL! | #NULL! |
| 2,261,145 | 2 | 2 | 52 | 166 | 51 | #NULL! | #NULL! |
| 2,261,876 | 2 | 1 | 44 | 170 | 63 | #NULL! | #NULL! |
| 262,339   | 2 | 2 | 50 | 165 | 60 | #NULL! | #NULL! |
| 2,263,164 | 2 | 1 | 41 | 169 | 98 | #NULL! | #NULL! |
| 2,263,571 | 2 | 1 | 54 | 171 | 77 | #NULL! | #NULL! |
| 2,264,232 | 2 | 2 | 49 | 164 | 60 | #NULL! | #NULL! |
| 2,264,267 | 2 | 1 | 45 | 169 | 59 | #NULL! | #NULL! |
| 2,264,379 | 2 | 1 | 50 | 173 | 70 | #NULL! | #NULL! |
| 2,264,475 | 2 | 1 | 54 | 168 | 64 | #NULL! | #NULL! |
| 2,264,691 | 2 | 1 | 25 | 170 | 49 | #NULL! | #NULL! |
| 2,264,993 | 2 | 1 | 47 | 164 | 75 | #NULL! | #NULL! |

|       |      |       |       |       |       |
|-------|------|-------|-------|-------|-------|
| 2.060 | 22.2 | 2,060 | 1,685 | 896   | 731   |
| 2.150 | 30.5 | 2,150 | 1,662 | 1,097 | 544   |
| 1.800 | 22.6 | 1,800 | 1,447 | 731   | 380   |
| 1.270 | 27.4 | 1,270 | 972   | 682   | 278   |
| 1.250 | 26.5 | 1,250 | 911   | 645   | 241   |
| 2.400 | 34.1 | 2,400 | 1,927 | 1,346 | 478   |
| 1.680 | 28.0 | 1,680 | 1,369 | 785   | 558   |
| 1.490 | 30.2 | 1,490 | 1,220 | 472   | 626   |
| 2.830 | 45.6 | 2,830 | 1,973 | 1,412 | 538   |
| 2.300 | 50.2 | 2,300 | 1,695 | 1,168 | 324   |
| 0.690 | 11.0 | 870   | 781   | 364   | 345   |
| 2.360 | 27.0 | 2,360 | 1,749 | 918   | 505   |
| 1.450 | 33.6 | 1,450 | 1,146 | 500   | 619   |
| 0.690 | 6.4  | 690   | 503   | 228   | 257   |
| 1.640 | 19.5 | 1,640 | 1,381 | 1,012 | 351   |
| 2.330 | 38.8 | 2,330 | 1,312 | 354   | 841   |
| 1.410 | 30.3 | 1,410 | 943   | 471   | 385   |
| 1.470 | 33.1 | 1,470 | 957   | 664   | 226   |
| 2.220 | 34.1 | 2,470 | 2,216 | 855   | 1,178 |
| 1.570 | 33.6 | 1,460 | 1,184 | 707   | 448   |
| 1.770 | 26.9 | 1,770 | 1,292 | 812   | 446   |
| 1.980 | 29.8 | 1,980 | 1,528 | 998   | 489   |
| 1.540 | 29.4 | 1,540 | 996   | 582   | 360   |
| 0.790 | 21.5 | 790   | 577   | 382   | 159   |
| 1.650 | 29.2 | 2,850 | 1,870 | 1,223 | 604   |
| 2.030 | 53.0 | 2,030 | 1,411 | 745   | 536   |
| 3.010 | 40.7 | 1,980 | 1,582 | 998   | 489   |
| 1.540 | 29.4 | 1,540 | 996   | 582   | 360   |
| 1.550 | 38.5 | 1,550 | 1,297 | 930   | 327   |
| 0.630 | 6.6  | 630   | 489   | 225   | 247   |
| 1.400 | 24.0 | 1,900 | 1,465 | 847   | 534   |
| 1.980 | 33.9 | 1,980 | 1,232 | 840   | 388   |
| 1.940 | 34.4 | 1,940 | 1,141 | 755   | 363   |
| 2.150 | 17.5 | 2,150 | 1,423 | 1,077 | 329   |
| 0.720 | 11.5 | 720   | 566   | 362   | 186   |
| 1.040 | 13.0 | 1,040 | 760   | 422   | 326   |
| 1.980 | 38.5 | 1,980 | 1,560 | 895   | 667   |
| 2.360 | 39.1 | 2,260 | 1,774 | 1,110 | 524   |
| 0.820 | 14.5 | 820   | 560   | 290   | 267   |
| 2.000 | 27.8 | 2,890 | 2,043 | 1,416 | 590   |
| 0.880 | 8.5  | 880   | 649   | 414   | 238   |
| 3.330 | 39.2 | 3,790 | 2,880 | 1,857 | 868   |
| 2.930 | 35.4 | 2,420 | 1,822 | 1,280 | 508   |
| 2.070 | 36.8 | 2,920 | 1,784 | 1,215 | 610   |
| 1.010 | 31.7 | 1,010 | 829   | 521   | 293   |
| 1.280 | 35.2 | 1,280 | 922   | 722   | 196   |
| 2.100 | 28.1 | 2,100 | 1,457 | 714   | 624   |
| 1.420 | 30.0 | 1,470 | 1,045 | 692   | 337   |
| 1.610 | 35.5 | 1,610 | 1,278 | 845   | 407   |
| 2.040 | 30.5 | 1,770 | 1,253 | 878   | 350   |
| 1.420 | 22.7 | 1,420 | 821   | 508   | 273   |
| 1.330 | 23.4 | 1,330 | 1,021 | 584   | 408   |
| 2.410 | 38.7 | 2,410 | 1,848 | 1,294 | 525   |
| 1.310 | 18.4 | 1,310 | 983   | 634   | 351   |
| 2.560 | 45.0 | 2,790 | 2,126 | 1,283 | 709   |
| 1.540 | 26.0 | 1,540 | 1,153 | 671   | 434   |

|      |      |      |      |     |     |      |
|------|------|------|------|-----|-----|------|
| 80.5 | 43.5 | 35.5 | 1.23 | 8   | 155 | 0.38 |
| 77.3 | 51.0 | 25.3 | 2.02 | 73  | 280 | 3.38 |
| 80.4 | 40.6 | 21.1 | 1.92 | 35  | 103 | 1.94 |
| 76.5 | 53.7 | 21.9 | 2.45 | 20  | 115 | 1.60 |
| 72.9 | 51.6 | 19.3 | 2.67 | 75  | 98  | 6.00 |
| 80.3 | 56.1 | 19.9 | 2.82 | 44  | 167 | 1.85 |
| 81.5 | 46.7 | 33.2 | 1.41 | 23  | 215 | 1.35 |
| 81.9 | 31.7 | 42.0 | 0.75 | 31  | 86  | 2.10 |
| 69.7 | 49.9 | 19.0 | 2.63 | 0   | 20  | 0.00 |
| 73.7 | 50.8 | 14.1 | 3.60 | 74  | 251 | 3.22 |
| 89.8 | 41.8 | 39.7 | 1.05 | 14  | 45  | 1.65 |
| 74.1 | 38.9 | 21.4 | 1.82 | 211 | 214 | 8.92 |
| 79.0 | 34.5 | 42.7 | 0.81 | 32  | 171 | 2.20 |
| 72.9 | 33.0 | 37.3 | 0.88 | 16  | 92  | 2.27 |
| 84.2 | 61.7 | 21.4 | 2.88 | 14  | 109 | 0.87 |
| 56.3 | 15.2 | 36.1 | 0.42 | 8   | 67  | 0.33 |
| 66.9 | 33.4 | 27.3 | 1.22 | 80  | 179 | 5.67 |
| 65.1 | 45.2 | 15.4 | 2.94 | 78  | 216 | 5.33 |
| 89.7 | 34.6 | 47.7 | 0.73 | 15  | 142 | 0.60 |
| 81.1 | 48.4 | 30.7 | 1.58 | 7   | 138 | 0.47 |
| 73.0 | 45.9 | 25.2 | 1.82 | 33  | 196 | 1.87 |
| 79.9 | 50.4 | 24.7 | 2.04 | 33  | 243 | 1.67 |
| 64.7 | 37.8 | 23.4 | 1.62 | 51  | 165 | 3.33 |
| 73.0 | 48.4 | 20.1 | 2.41 | 23  | 108 | 2.93 |
| 65.6 | 42.9 | 21.2 | 2.02 | 91  | 279 | 3.20 |
| 69.5 | 36.7 | 26.4 | 1.39 | 41  | 311 | 2.00 |
| 79.9 | 50.4 | 24.7 | 2.04 | 33  | 243 | 1.67 |
| 64.7 | 37.8 | 23.4 | 1.62 | 51  | 165 | 3.33 |
| 83.7 | 60.0 | 21.1 | 2.84 | 5   | 168 | 0.33 |
| 77.6 | 35.7 | 39.2 | 0.91 | 0   | 26  | 0.07 |
| 77.1 | 44.6 | 28.1 | 1.59 | 67  | 289 | 3.53 |
| 62.2 | 42.4 | 19.6 | 2.16 | 82  | 330 | 4.13 |
| 58.8 | 38.9 | 18.7 | 2.08 | 40  | 217 | 2.07 |
| 66.2 | 50.1 | 15.3 | 3.27 | 54  | 314 | 2.53 |
| 78.6 | 50.3 | 25.9 | 1.94 | 0   | 22  | 0.00 |
| 73.1 | 40.6 | 31.3 | 1.30 | 0   | 35  | 0.00 |
| 78.8 | 45.2 | 33.7 | 1.34 | 86  | 263 | 4.33 |
| 78.5 | 49.1 | 23.2 | 2.12 | 62  | 345 | 2.73 |
| 68.3 | 35.4 | 32.5 | 1.09 | 26  | 119 | 3.20 |
| 70.7 | 49.0 | 20.4 | 2.40 | 83  | 410 | 2.87 |
| 73.8 | 47.0 | 27.1 | 1.73 | 13  | 117 | 1.47 |
| 76.0 | 49.0 | 22.9 | 2.14 | 99  | 783 | 2.60 |
| 75.3 | 52.9 | 21.0 | 2.52 | 26  | 294 | 1.07 |
| 61.1 | 41.6 | 20.9 | 1.99 | 148 | 685 | 5.07 |
| 82.1 | 51.6 | 29.0 | 1.78 | 9   | 53  | 0.93 |
| 72.0 | 56.4 | 15.3 | 3.69 | 3   | 90  | 0.20 |
| 69.4 | 34.0 | 29.7 | 1.14 | 11  | 181 | 0.53 |
| 71.1 | 47.1 | 22.9 | 2.06 | 31  | 137 | 2.13 |
| 79.4 | 52.5 | 25.3 | 2.08 | 10  | 164 | 0.60 |
| 70.8 | 49.6 | 19.8 | 2.51 | 48  | 257 | 2.73 |
| 57.8 | 35.8 | 19.2 | 1.86 | 7   | 75  | 0.47 |
| 76.8 | 43.9 | 30.7 | 1.43 | 24  | 169 | 1.80 |
| 76.7 | 53.7 | 21.8 | 2.46 | 39  | 236 | 1.60 |
| 75.0 | 48.4 | 26.8 | 1.81 | 24  | 219 | 1.87 |
| 76.2 | 46.0 | 25.4 | 1.81 | 19  | 299 | 0.67 |
| 74.9 | 43.6 | 28.2 | 1.55 | 29  | 203 | 1.87 |

7.50  
13.00  
5.74  
9.07  
7.85  
6.95  
12.80  
5.75  
0.70  
10.91  
5.15  
9.06  
11.18  
13.33  
6.67  
2.87  
12.73  
14.67  
5.73  
9.47  
11.07  
12.27  
10.73  
13.67  
9.80  
15.33  
12.27  
10.73  
10.87  
4.07  
15.20  
16.67  
11.20  
14.60  
3.00  
3.33  
13.27  
15.27  
14.47  
14.20  
13.33  
20.67  
12.13  
23.47  
5.20  
7.07  
8.60  
9.33  
10.20  
14.53  
5.27  
12.73  
9.80  
16.73  
10.73  
13.20



|           |   |   |    |     |     |        |        |
|-----------|---|---|----|-----|-----|--------|--------|
| 2,265,098 | 2 | 2 | 52 | 150 | 70  | #NULL! | #NULL! |
| 2,265,099 | 2 | 1 | 49 | 173 | 92  | #NULL! | #NULL! |
| 2,265,100 | 2 | 1 | 42 | 166 | 75  | #NULL! | #NULL! |
| 2,265,287 | 2 | 2 | 55 | 169 | 70  | #NULL! | #NULL! |
| 2,265,438 | 2 | 1 | 46 | 167 | 70  | #NULL! | #NULL! |
| 2,265,781 | 2 | 2 | 38 | 170 | 100 | #NULL! | #NULL! |
| 2,265,916 | 2 | 2 | 24 | 172 | 56  | #NULL! | #NULL! |
| 2,266,107 | 2 | 1 | 51 | 177 | 55  | #NULL! | #NULL! |
| 2,267,535 | 2 | 1 | 50 | 170 | 40  | #NULL! | #NULL! |
| 1,226,004 | 2 | 1 | 49 | 172 | 68  | #NULL! | #NULL! |
| 2,267,783 | 2 | 1 | 43 | 175 | 67  | #NULL! | #NULL! |
| 1,220,933 | 2 | 1 | 42 | 167 | 49  | #NULL! | #NULL! |
| 2,266,511 | 2 | 2 | 42 | 172 | 68  | #NULL! | #NULL! |
| 2,227,975 | 2 | 1 | 16 | 171 | 75  | #NULL! | #NULL! |

|       |      |       |       |       |     |
|-------|------|-------|-------|-------|-----|
| 2.320 | 34.7 | 2,320 | 1,749 | 1,283 | 432 |
| 1.730 | 29.0 | 1,730 | 1,337 | 787   | 519 |
| 1.620 | 26.1 | 1,620 | 1,275 | 773   | 428 |
| 1.790 | 31.0 | 1,790 | 1,190 | 967   | 140 |
| 2.260 | 32.6 | 2,260 | 1,559 | 644   | 841 |
| 1.530 | 23.3 | 1,850 | 1,393 | 744   | 568 |
| 1.680 | 32.8 | 1,680 | 1,384 | 771   | 415 |
| 2.300 | 38.0 | 2,300 | 1,854 | 1,281 | 543 |
| 0.680 | 8.7  | 680   | 574   | 394   | 184 |
| 1.270 | 15.2 | 1,270 | 819   | 654   | 141 |
| 3.520 | 34.7 | 3,250 | 2,267 | 1,461 | 729 |
| 1.450 | 17.9 | 1,450 | 916   | 666   | 236 |
| 1.890 | 36.4 | 700   | 454   | 284   | 155 |
| 2.900 | 30.9 | 2,900 | 2,256 | 1,035 | 992 |

|      |      |      |      |    |     |      |
|------|------|------|------|----|-----|------|
| 75.4 | 55.3 | 18.6 | 2.97 | 32 | 311 | 1.40 |
| 77.3 | 45.5 | 30.0 | 1.52 | 25 | 206 | 1.47 |
| 78.7 | 47.7 | 26.4 | 1.81 | 52 | 196 | 3.20 |
| 66.5 | 54.0 | 7.8  | 6.92 | 24 | 170 | 1.33 |
| 69.0 | 28.5 | 37.2 | 0.77 | 32 | 310 | 1.40 |
| 75.3 | 40.2 | 30.7 | 1.31 | 51 | 231 | 2.73 |
| 82.4 | 45.9 | 24.7 | 1.86 | 13 | 133 | 0.80 |
| 80.6 | 55.7 | 23.6 | 2.36 | 21 | 219 | 0.93 |
| 84.4 | 57.9 | 27.1 | 2.14 | 0  | 24  | 0.07 |
| 64.5 | 51.5 | 11.1 | 4.64 | 16 | 169 | 1.27 |
| 64.4 | 41.5 | 20.7 | 2.00 | 17 | 228 | 0.47 |
| 63.2 | 45.9 | 16.3 | 2.82 | 5  | 184 | 0.33 |
| 64.8 | 40.6 | 22.1 | 1.84 | 11 | 87  | 1.63 |
| 77.8 | 35.7 | 34.2 | 1.04 | 43 | 410 | 1.47 |

13.40  
11.93  
12.07  
9.47  
13.73  
12.47  
7.93  
9.53  
3.47  
13.33  
6.47  
12.67  
12.44  
14.13
